# Supplementary material for: Macromolecular diffusion in crowded media beyond the hard-sphere model
Source: Royal Society of Chemistry journal article supplement (doi:10.1039/c8sm00201k), 2018-01-01
Supplement: c8sm00201k1.pdf [file c8sm00201k1.pdf]

## Electronic Supplementary Information

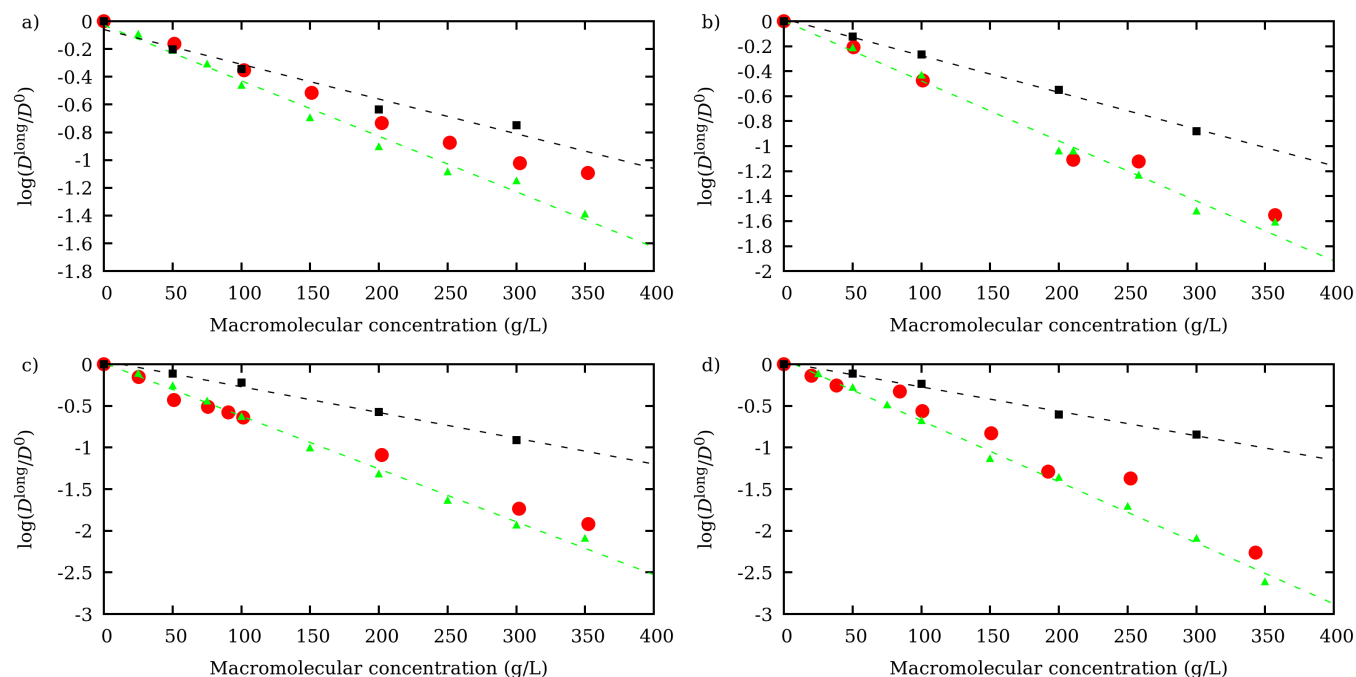

**Fig. 1**  $\log(D^{\text{long}}/D_0)$  for streptavidin *versus* macromolecular concentration for D10 (a), D50 (b), D400 (c) and D700 (d). Black squares represent BD simulations using hard-sphere model as explained in<sup>2</sup> and green triangles correspond to BD simulations using CESP model. Experimental values<sup>2</sup> are depicted as red circles. Dashed lines follow the simulation results and they are only to guide the eyes.
